# Supplementary material
Source: PubMed Central journal article supplement (PMC4201136)
Supplement: supp_mol.114.094516_Supplemental_information_94516.pdf [file supp_mol.114.094516_Supplemental_information_94516.pdf]

**Structural determinants and mechanism of action of a GluN2C-  
selective NMDA receptor positive allosteric modulator**

Alpa Khatri, Pieter B. Burger, Sharon A. Swanger, Kasper B. Hansen, Sommer  
Zimmerman, Erkan Karakas, Dennis C. Liotta, Hiro Furukawa, James. P. Snyder,  
Stephen F. Traynelis

Journal: Molecular Pharmacology

Emory University, Pharmacology Department: AK, SAS, SFT

Emory University, Chemistry Department: SZ, PB, DCL, JPS

University of Montana, Dept of Biomedical and Pharmaceutical Sciences, and Center  
for Biomolecular Structure and Dynamics: KBH

Cold Spring Harbor Labs: EK, HF

## Supplemental Figure S1.

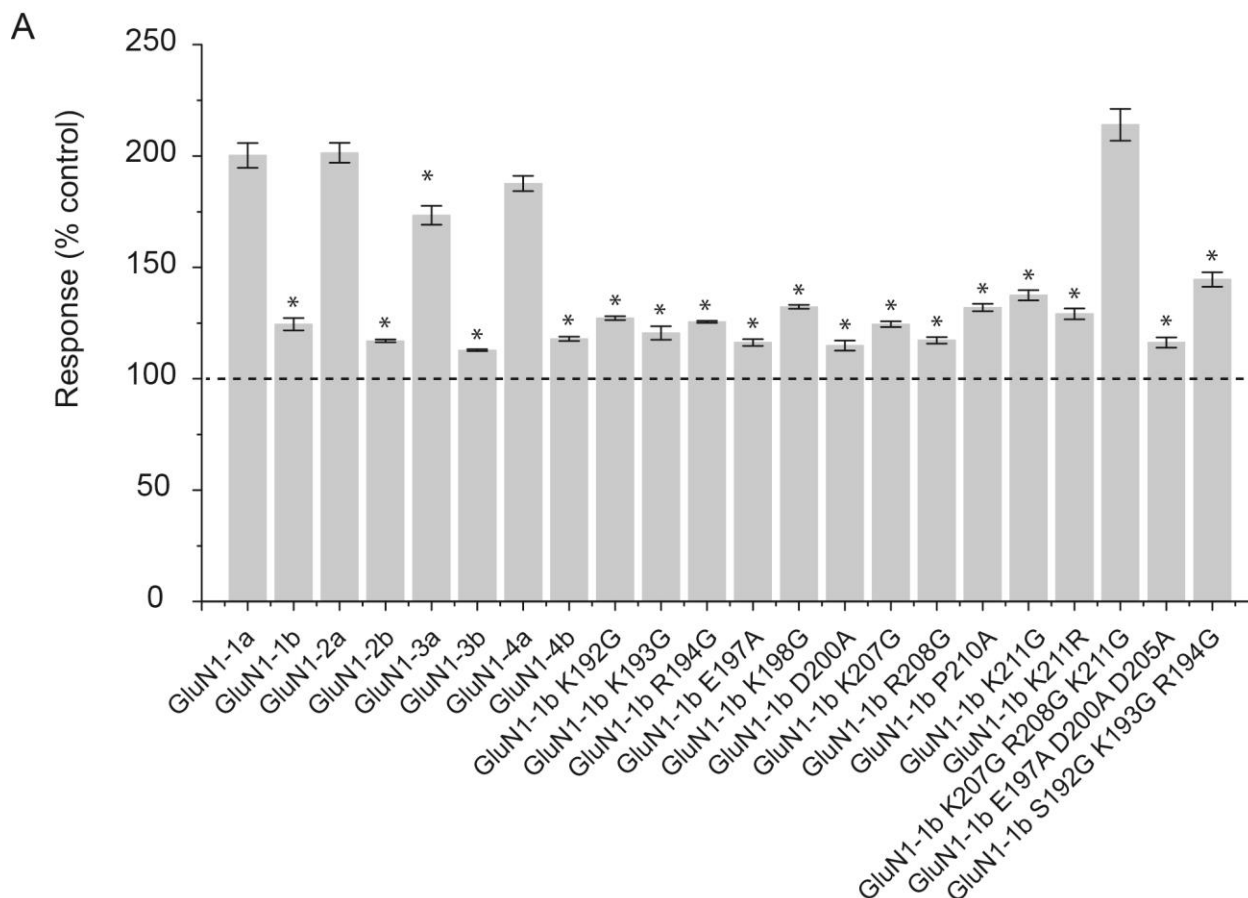

**Supplemental Figure S1.** Evaluation of the effects of individual GluN1-1b exon-5 mutations on enhancement of the responses of GluN1-1b/GluN2C expressed in *Xenopus* oocytes to 100  $\mu$ M glutamate and 30  $\mu$ M glycine by 100  $\mu$ M PYD-1. The response shown is the ratio of current obtained in the presence and absence of PYD-1, and is shown as a percent of control recorded in the same oocyte. For all responses, n = 4-18 oocytes. \* p < 0.05 paired *t*-test or ANOVA against control experiments with wild-type receptor.

**Supplemental Figure S2.**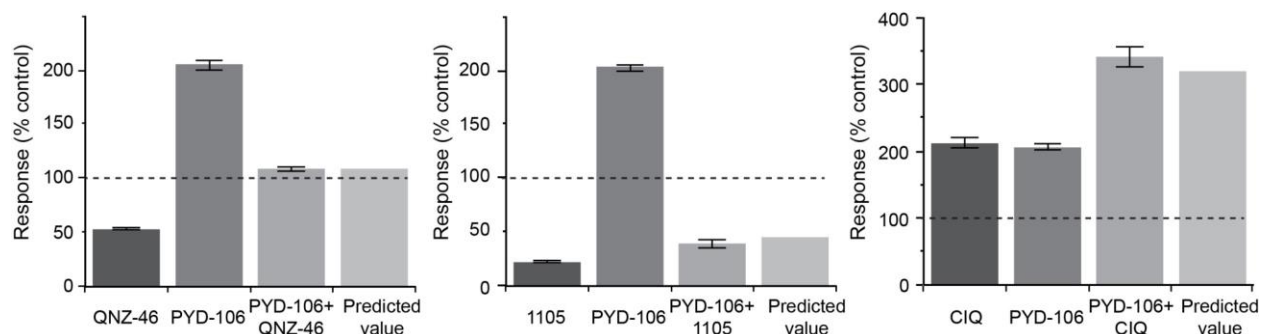

**Supplemental Figure S2.** (A-C) PYD-106 was co-applied with QNZ-46 (2C/D inhibitor), DQP-1105 (2C/D inhibitor), and CIQ (2C/D positive allosteric modulator) to determine if PYD-106 shares structural determinants of action with these modulators. The effects of co-applying PYD-106 can be calculated assuming its actions are independent of modulation by QNZ-46, DQP-1105, or CIQ (given as the predicted value). The control response in the absence of PYD is shown as a dashed line, and is taken as 100%. Co-application of PYD-106 should enhance the response in QNZ-46 to 108% of drug-free control, in DQP-1105 inhibition to 46% of drug-free control, and in CIQ to 318% of drug-free control. The observed values were  $108 \pm 2.3\%$  of control for QNZ-46,  $39 \pm 3.5\%$  of control for DQP-1105, and  $340 \pm 14.3\%$  of control for CIQ. The predicted values for QNZ-46 and CIQ co-modulation were within 6% of observed values ( $p < 0.05$ ), consistent with independent sites of action. The predicted co-modulation of DQP-1105 was 5.5% higher than that observed ( $p < 0.05$ ), raising the possibility that QNZ-46 and PYD-106 may share some downstream structural determinants (for all  $n = 4-7$  oocytes, one way ANOVA, Tukey's post hoc).

**Supplemental Table S1.**

| <b>Chimera</b>           | <b>GluN2A</b>  | <b>GluN2C</b>     |
|--------------------------|----------------|-------------------|
| GluN2A                   | 1462           | 0                 |
| GluN2C                   | 0              | 1238              |
| 2A (2C ATD)              | 391-end        | 1-400             |
| 2A (2C ATD, L0)          | 405-end        | 1-414             |
| 2A (2C ATD, L0, S1)      | 538-end        | 1-535             |
| 2A (2CL0, S1, M123, S2)  | 1-390, 803-end | 401-813           |
| 2A (2C S2)               | 1-656, 814-end | 654-811           |
| 2C (2A L0, S1, M123, S2) | 383-813        | 1-330, 812-end    |
| 2C (2A ATD)              | 1-382          | 330-end           |
| 2C (2A L0)               | 391-404        | 1-388, 401-end    |
| 2C (2A L0, S1)           | 391-539        | 1-388, 538-end    |
| 2C (2A S1)               | 405-539        | 1-401, 538-end    |
| 2C (2A S2)               | 661-801        | 1-658, 800 to end |

The amino acid compositions of the chimeras are given as the GluN2A and GluN2D amino acids included in the chimera (See Figure 6).

**Supplementary Table S2: Off-target responses for PYD-106**

| Receptor                           | 100 – 100 ( $I_{\text{Test(PYD-106)}} / I_{\text{control}}$ ) (%) | n |
|------------------------------------|-------------------------------------------------------------------|---|
| Serotonin receptor 5-HT1A          | 9.1                                                               | 4 |
| Serotonin receptor 5-HT1B          | 26.1                                                              | 4 |
| Serotonin receptor 5-HT1D          | -11.3                                                             | 4 |
| Serotonin receptor 5-HT1E          | 11.2                                                              | 4 |
| Serotonin receptor 5-HT2A          | -3.7                                                              | 4 |
| Serotonin receptor 5-HT2B          | 40.8                                                              | 4 |
| Serotonin receptor 5-HT2C          | -29.7                                                             | 4 |
| Serotonin receptor 5-HT3           | -9                                                                | 4 |
| Serotonin receptor 5-HT5A          | 1.2                                                               | 4 |
| Serotonin receptor 5-HT6           | 17.8                                                              | 4 |
| Serotonin receptor 5-HT7           | 11.8                                                              | 4 |
| Adrenergic receptor $\alpha$ 1A    | -19.3                                                             | 4 |
| Adrenergic receptor $\alpha$ 1B    | 21                                                                | 4 |
| Adrenergic receptor $\alpha$ 1D    | 0.6                                                               | 4 |
| Adrenergic receptor $\alpha$ 2A    | 25.5                                                              | 4 |
| Adrenergic receptor $\alpha$ 2B    | 11                                                                | 4 |
| Adrenergic receptor $\alpha$ 2C    | 51.4                                                              | 4 |
| Adrenergic receptor $\beta$ 2      | 2.1                                                               | 4 |
| Adrenergic receptor $\beta$ 3      | -9.9                                                              | 4 |
| Benzodiazepine site in Rat Brain   | 1.8                                                               | 4 |
| Dopamine receptor D1               | -0.1                                                              | 4 |
| Dopamine receptor D2               | 20.7                                                              | 4 |
| Dopamine receptor D3               | -1.1                                                              | 4 |
| Dopamine receptor D4               | 21.6                                                              | 4 |
| Dopamine receptor D5               | 19.2                                                              | 4 |
| Opioid receptor ( $\delta$ )       | -1.2                                                              | 4 |
| Opioid receptor ( $\kappa$ )       | 76.8                                                              | 4 |
| Opioid receptor ( $\mu$ )          | 4.5                                                               | 4 |
| Histamine receptor H1              | 4.7                                                               | 4 |
| Histamine receptor H2              | -16.6                                                             | 4 |
| Histamine receptor H3              | 14                                                                | 4 |
| Muscarinic receptor M1             | -14.2                                                             | 4 |
| Muscarinic receptor M2             | -18                                                               | 4 |
| Muscarinic receptor M3             | -10.7                                                             | 4 |
| Muscarinic receptor M4             | 1.1                                                               | 4 |
| Muscarinic receptor M5             | -1.9                                                              | 4 |
| Sigma receptor 1                   | 31.9                                                              | 4 |
| Sigma receptor 2                   | -14.2                                                             | 4 |
| Peripheral benzodiazepine receptor | -2                                                                | 4 |
| Norepinephrine transporter         | -18.6                                                             | 4 |
| Dopamine transporter               | 52.6                                                              | 4 |
| Serotonin transporter              | 18.6                                                              | 4 |

PYD-106 (10  $\mu$ M) was screened for binding to 42 receptors, transporters, or ion channels in primary radioligand-binding assays; the percent inhibition of binding is shown. Targets at which the primary screen showed more than 50% inhibition of binding were subject to determination of  $K_i$ ; both the adrenergic  $\alpha_2C$  receptor and dopamine transporter had a  $K_i$  of greater than 10  $\mu$ M whereas the  $\kappa$ -Opioid receptor (KOR) had a  $K_i$  of 6  $\mu$ M. Data is from the National Institute of Mental Health's Psychoactive Drug Screening Program, Contract # HHSN-271-2008-025C. The NIMH PDSP is directed by Bryan L. Roth MD, PhD at the University of North Carolina at Chapel Hill (Project Officer Jamie Driscoll at NIMH, Bethesda MD, USA).

**Supplemental Table S3.**

| # <sup>a</sup> | $I_{\text{TEST}}/I_{\text{CONTROL}}$ (%)                   |   |      |                                                           |   |     | N |
|----------------|------------------------------------------------------------|---|------|-----------------------------------------------------------|---|-----|---|
|                | GluN2C <sub>C1</sub> *+GluN2C <sub>C2</sub> * <sup>b</sup> |   |      | GluN2A <sub>C1</sub> +GluN2C <sub>C2</sub> * <sup>b</sup> |   |     |   |
| PYD-1          | 213                                                        | ± | 11.1 | 92                                                        | ± | 1.4 | 4 |
| PYD-100        | 212                                                        | ± | 4.8  | 86                                                        | ± | 1.3 | 4 |
| PYD-115        | 146                                                        | ± | 7.0  | 96                                                        | ± | 1.7 | 4 |
| PYD-156        | 156                                                        | ± | 6.4  | 92                                                        | ± | 2.5 | 4 |
| PYD-84         | 246                                                        | ± | 3.6  | 88                                                        | ± | 1.8 | 4 |
| PYD-103        | 170                                                        | ± | 4.1  | 96                                                        | ± | 2.5 | 4 |
| PYD-102        | 160                                                        | ± | 2.3  | 92                                                        | ± | 0.9 | 4 |
| PYD-106        | 231                                                        | ± | 4.0  | 93                                                        | ± | 1.5 | 4 |
| PYD-72         | 212                                                        | ± | 5.2  | 93                                                        | ± | 1.3 | 4 |
| PYD-62         | 194                                                        | ± | 2.4  | 89                                                        | ± | 1.0 | 4 |
| PYD-69         | 156                                                        | ± | 1.9  | 89                                                        | ± | 1.2 | 4 |
| PYD-119        | 245                                                        | ± | 5.2  | 94                                                        | ± | 3.5 | 4 |
| PYD-65         | 225                                                        | ± | 0.6  | 85                                                        | ± | 0.7 | 4 |
| PYD-118        | 149                                                        | ± | 0.8  | 90                                                        | ± | 0.7 | 4 |
| PYD-116        | 207                                                        | ± | 9.0  | 79                                                        | ± | 1.0 | 4 |
| PYD-117        | 197                                                        | ± | 1.3  | 85                                                        | ± | 2.6 | 4 |
| PYD-111        | 177                                                        | ± | 2.9  | 97                                                        | ± | 2.3 | 4 |
| PYD-112        | 170                                                        | ± | 1.8  | 85                                                        | ± | 0.9 | 4 |
| PYD-113        | 149                                                        | ± | 1.1  | 87                                                        | ± | 0.5 | 4 |

<sup>a</sup> Corresponding number in Zimmerman et al 2014.

<sup>b</sup> Responses as percent of control are shown for 100  $\mu\text{M}$  of the indicated PYD analogue co-applied with 100  $\mu\text{M}$  glutamate and 30  $\mu\text{M}$  glycine.
